# Supplementary figures and images for: Novel Tick Phlebovirus Genotypes Lacking Evidence for Vertebrate Infections in Anatolia and Thrace, Turkey
Source: MDPI journal article supplement (doi:10.3390/v11080703), 2019-08-01

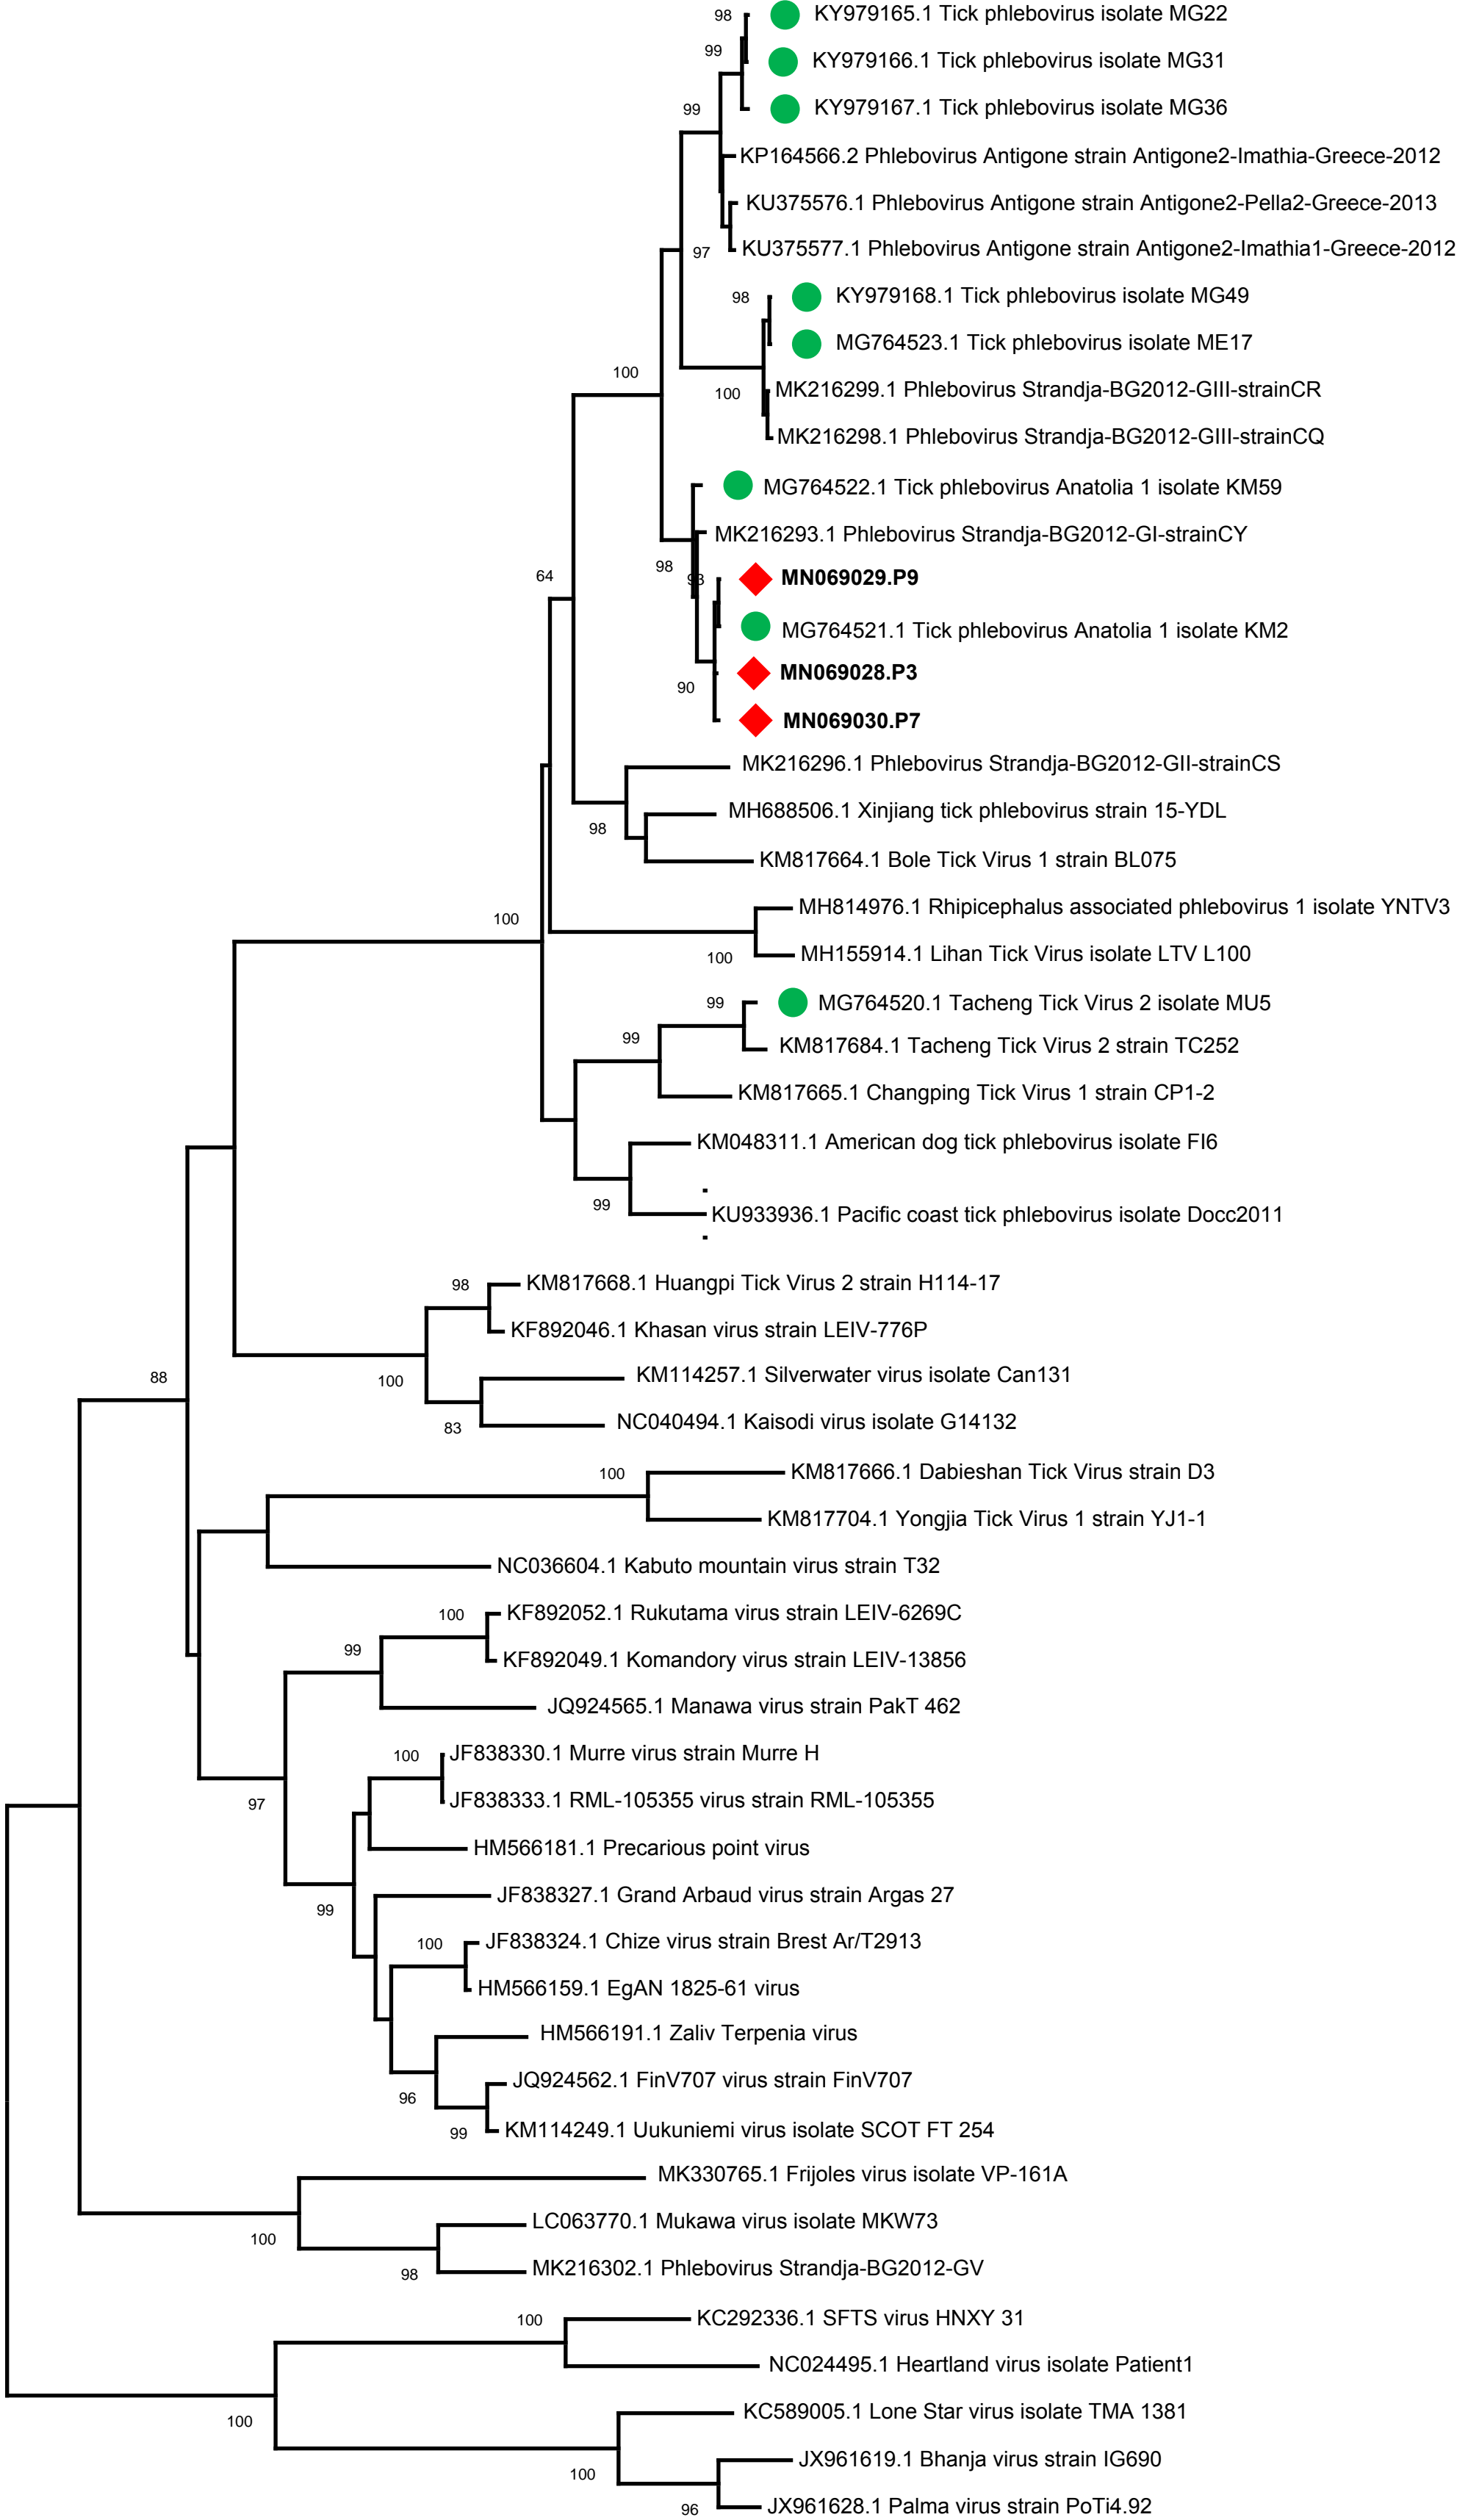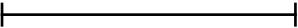

0.5

Supplement: s1 [file s1]
